# Supplementary material for: Proteomic associations with forced expiratory volume: a Mendelian randomisation study
Source: PubMed Central journal article supplement (PMC10797790; doi:10.1186/s12931-023-02587-z), 2024-01-18

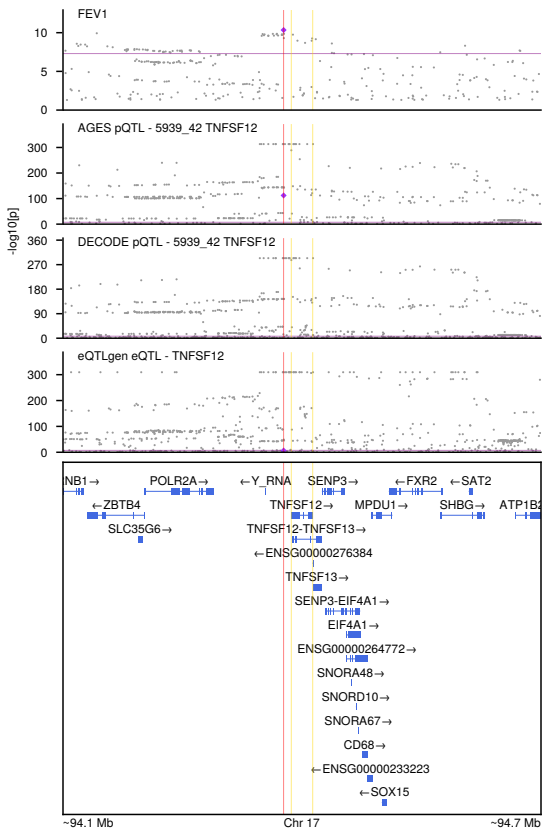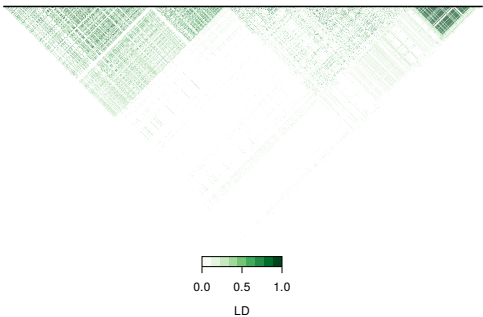

Supplement: 12931_2023_2587_MOESM3_ESM.pdf [file 12931_2023_2587_MOESM3_ESM.pdf]
